# Supplementary material for: Nature Prescriptions for Health: A Review of Evidence and Research Opportunities
Source: MDPI journal article supplement (doi:10.3390/ijerph17124213), 2020-06-12
Supplement: s1 [file s1]

## Supplementary Material

### Database Search Terms

#### Scopus

"outdoor activity prescription\*" OR "nature prescription\*" OR "park prescription\*" OR "outdoor prescription\*" OR "prescrib\* nature" OR "outdoor play" OR "nature based activit\*" OR "outdoor physical activity" OR "nature engagement" OR "green prescription\*" OR "outdoor prescription\*" OR "green exercise" OR "nature play" OR "nature AND outdoor activit\*" OR "green care" OR "wander garden therap\*" OR "ecotherapy\*" OR "horticultural therap\*" OR "nature assisted therap\*"

#### EMBASE

'outdoor activity prescription\*' OR 'nature prescription\*' OR 'park prescription\*' OR 'outdoor prescription\*' OR 'prescrib\* nature' OR 'outdoor play' OR 'nature based activit\*' OR 'outdoor physical activity' OR 'nature engagement' OR 'green prescription\*' OR 'outdoor prescription\*' OR 'green exercise' OR 'nature play' OR 'nature AND outdoor activit\*' OR 'green care' OR 'wander garden therap\*' OR 'ecotherapy\*' OR 'horticultural therap\*' OR 'nature assisted therap\*'

#### MEDLINE

outdoor activity prescription OR nature prescription OR park prescription OR outdoor prescription OR prescribe\* nature OR outdoor play OR nature-based activity OR outdoor physical activity OR nature engagement OR green prescription OR outdoor prescription OR green exercise OR nature play OR nature AND outdo activit\* OR green care OR wander garden therap\* OR ecotherapy OR horticultural therap OR nature assisted therap\*
